# Supplementary material
Source: PubMed Central journal article supplement (PMC4550370)
Supplement: supp_fj.15-272906_Supplemental_Figure1.pdf [file supp_fj.15-272906_Supplemental_Figure1.pdf]

**Table S2.** Evidence of similarities to S15 catalytic domains found in metatranscriptomes from the deep subsurface. Shown are the hits to the Pfam of bathyaminopeptidase in Peru Margin Ocean Drilling Program Leg 201 marine sediment metatranscriptomes.

| MG-RAST ID | Depth (mbsf) | S15 Hits (PF02129) (e-value $\geq 1e-5$ ) | Total Gbp | S15/total genes | S15/Gbp  |
|------------|--------------|-------------------------------------------|-----------|-----------------|----------|
| 4510337.3  | 5            | 1                                         | 18.9      | 6.82E-05        | 5.29E-02 |
| 4510335.3  | 30           | 14                                        | 11.4      | 1.21E-04        | 1.23E-00 |
| 4510336.3  | 50           | 8                                         | 23.2      | 3.46E-04        | 3.45E-01 |
| 4515477.3  | 70           | 1                                         | 16.5      | 3.69E-05        | 6.06E-02 |
| 4515478.3  | 91           | 3                                         | 34.7      | 1.16E-04        | 8.64E-02 |
| 4515476.3  | 159          | 3                                         | 25.8      | 9.77E-05        | 1.16E-01 |

**Table S3:** Inhibition constants for various compounds, against L-Phe-AMC.

| Inhibitor             | $K_i$ , $\mu\text{M}$ |
|-----------------------|-----------------------|
| D-Leu-NH <sub>2</sub> | 1450                  |
| D-Leu-OMe             | 890                   |
| D-Phe-NH <sub>2</sub> | 4500                  |
| D-Phe-OMe             | 845                   |
| D-Phg-NH <sub>2</sub> | 2100                  |
| D-Phg-OMe             | 1950                  |
| L-Leu-NH <sub>2</sub> | 2290                  |
| L-Leu-OMe             | 107                   |
| L-Phe-NH <sub>2</sub> | 242                   |
| L-Phe-OMe             | 56                    |
| L-Phg-NH <sub>2</sub> | 1910                  |
| L-Phg-OMe             | 1770                  |

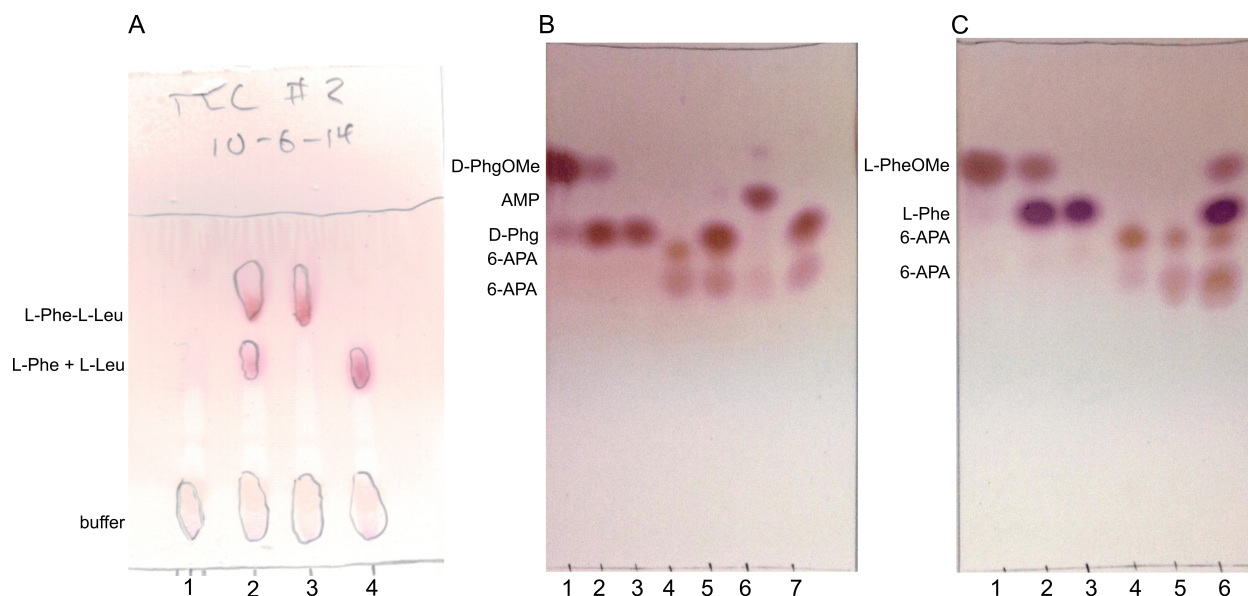

**Fig. S1.** TLC-based assay for BAP activity. A) Lanes: 1 – BAP alone, 2 – L-Phe-L-Leu + enzyme, 3 – L-Phe-L-Leu + enzyme + L-Leu + L-Phe, 4 – L-Leu + L-Phe. B) Lanes: 1 – D-Phg-OMe, 2 – D-Phg-OMe with BAP, 3 – D-Phg, 4 – 6-APA with BAP, 5 – D-Phg-OMe with 6-APA and BAP, 6 – ampicillin (AMP), 7 – ampicillin with BAP. C) Lanes: 1 – L-Phe-OMe, 2 – L-Phe-OMe with BAP, 3 – L-Phe, 4 – 6-APA, 5 – 6-APA with BAP, 6 – L-Phe-OMe with 6-APA and BAP. Note, that 6-APA migrates as two species, which is most likely attributed to two protonation states.
